# Supplementary material
Source: PubMed Central journal article supplement (PMC2850243)
Supplement: en.2009-1133_1.pdf [file en.2009-1133_1.pdf]

**Supplemental Table 1. Effects of maternal nutrition on serum lipid, glucose and markers of inflammation in female CO and UO.** Serum samples were collected from mice mid-light phase (CT6) or mid-dark phase (CT18). (n.d. – no data). \*

p<0.05

for effects of adult diet at either CT6 or CT18, CO vs UO.

| Diet:                       | Control Diet |           |            |            | HFD       |            |            |             |
|-----------------------------|--------------|-----------|------------|------------|-----------|------------|------------|-------------|
| Time:                       | CO<br>CT6    | UO<br>CT6 | CO<br>CT18 | UO<br>CT18 | CO<br>CT6 | UO<br>CT6  | CO<br>CT18 | UO<br>CT18  |
| Age 8 wk                    | N=15         | N=15      | N=15       | N=15       | N=15      | N=15       | N=20       | N=20        |
| Glucose<br>(mg/dl)          | 135 ± 8      | 76 ± 10*  | 115 ± 20   | 125 ± 13   | nd        | nd         | nd         | nd          |
| Insulin<br>(ng/ml)          | 1.1 ± 0.5    | 1.2 ± 0.8 | 1.6 ± 0.8  | 1.3 ± 0.6  | nd        | nd         | nd         | nd          |
| <b>Blood Lipids</b>         |              |           |            |            |           |            |            |             |
| TG<br>(mg/dl)               | 20 ± 6       | 22 ± 8    | 28 ± 6     | 24 ± 5     | nd        | nd         | nd         | nd          |
| Cholest.<br>(mg/dl)         | 31 ± 4       | 38 ± 2*   | 41 ± 3     | 48 ± 3     | nd        | nd         | nd         | nd          |
| <b>Age 20 wk</b>            |              |           |            |            |           |            |            |             |
| Glucose<br>(mg/dl)          | 125 ± 17     | 135 ± 10  | 132 ± 15   | 143 ± 10   | 300 ± 20  | 390 ± 15*  | 345 ± 8    | 412 ± 21*   |
| Insulin<br>(ng/ml)          | 1.3 ± 0.8    | 1.3 ± 0.5 | 1.5 ± 0.6  | 2.5 ± 0.9  | 3.8 ± 0.3 | 5.9 ± 0.9* | 3.8 ± 0.8  | 6.0 ± 0.3*  |
| Leptin<br>(ng/ml)           | 9.0 ± 2.0    | 10 ± 2.5  | 8 ± 2.3    | 8 ± 3.0    | 32 ± 5.0  | 42 ± 7.0*  | 25.5 ± 3.0 | 36.9 ± 3.2* |
| <b>Blood Lipids</b>         |              |           |            |            |           |            |            |             |
| TG<br>(mg/dl)               | 56 ± 18      | 92 ± 15*  | 95 ± 10    | 145 ± 19*  | 128 ± 20  | 171 ± 10*  | 154 ± 10   | 188 ± 5*    |
| Cholest.<br>(mg/dl)         | 21 ± 8       | 54 ± 10*  | 25 ± 4     | 59 ± 4*    | 69 ± 9    | 99 ± 10*   | 102 ± 13   | 142 ± 16*   |
| <b>Inflammatory markers</b> |              |           |            |            |           |            |            |             |
| Tnfα<br>(ng/ml)             | 123 ± 13     | 136 ± 10  | 180 ± 26   | 220 ± 20   | 158 ± 11  | 177 ± 17   | 148 ± 12   | 172 ± 13*   |
| PAI-1<br>(ng/ml)            | 19 ± 10      | 17 ± 6    | 32 ± 10    | 46 ± 5     | 18 ± 4    | 25 ± 6     | 22 ± 3     | 38 ± 16     |

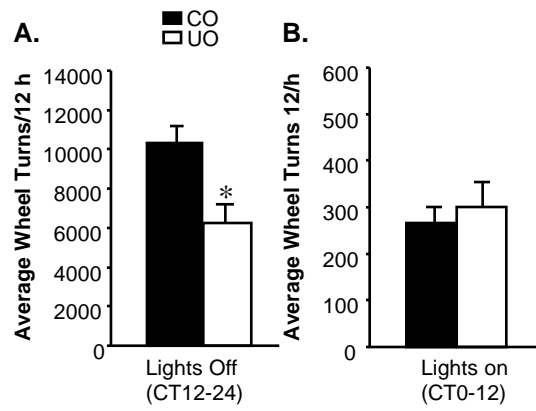

Sutton et al. Supplemental Fig. 1
